# Supplementary material for: Engineering cocrystal thermodynamic stability and eutectic points by micellar solubilization and ionization
Source: Royal Society of Chemistry journal article supplement (doi:10.1039/c1ce05381g), 2011-01-01
Supplement: c1ce05381g.pdf [file c1ce05381g.pdf]

## Appendix

### *Derivation of equations*

Explanation of terms:

Subscript aq – aqueous

Subscript m – micellar

Subscript T – total (aqueous + micellar)

R – nonionizable drug

HA – monoprotic weakly acidic coformer (nonionized)

H<sub>2</sub>A – diprotic weakly acidic coformer (nonionized)

HAB – amphoteric coformer (nonionized)

M – micellar surfactant

K<sub>sp</sub> – cocrystal solubility product

K<sub>a</sub> – acid dissociation constant

K<sub>s</sub> – micellar solubilization constant

K<sub>eu</sub> – eutectic constant

S – solubility

CMC – critical micellar concentration

CSC – critical stabilization concentration

*RHA (1:1 nonionizable drug R, monoprotic weakly acidic coformer HA)*

Relevant equilibria are given by

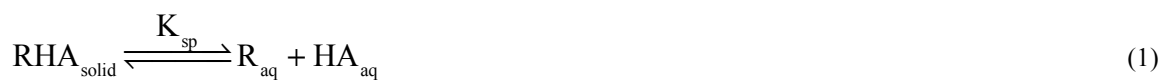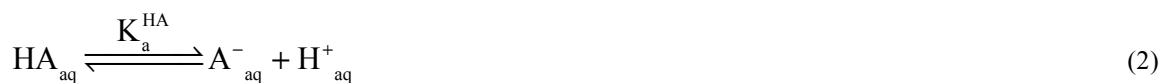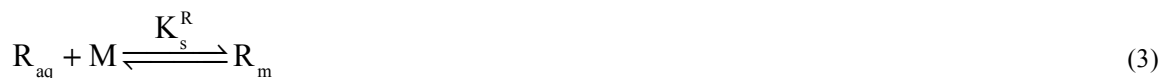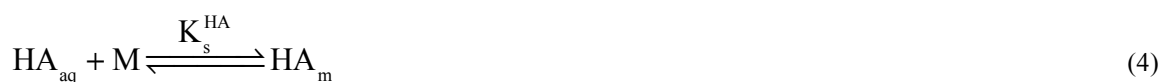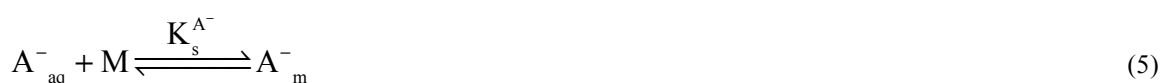

Associated equilibrium constants are given by

$$K_{\text{sp}} = [\text{R}]_{\text{aq}} [\text{HA}]_{\text{aq}} \quad (6)$$

$$K_{\text{a}}^{\text{HA}} = \frac{[\text{A}^{-}]_{\text{aq}} [\text{H}^{+}]_{\text{aq}}}{[\text{HA}]_{\text{aq}}} \quad (7)$$

$$K_{\text{s}}^{\text{R}} = \frac{[\text{R}]_{\text{m}}}{[\text{R}]_{\text{aq}} [\text{M}]} \quad (8)$$

$$K_{\text{s}}^{\text{HA}} = \frac{[\text{HA}]_{\text{m}}}{[\text{HA}]_{\text{aq}} [\text{M}]} \quad (9)$$

$$K_{\text{s}}^{\text{A}^{-}} = \frac{[\text{A}^{-}]_{\text{m}}}{[\text{A}^{-}]_{\text{aq}} [\text{M}]} \quad (10)$$

*Solubility of cocrystal RHA*

Mass balance on R is given by

$$[\text{R}]_{\text{T}} = [\text{R}]_{\text{aq}} + [\text{R}]_{\text{m}} \quad (11)$$

Substituting (6) and (8) into (11) gives

$$[R]_T = \frac{K_{sp}}{[HA]_{aq}} \left( 1 + K_s^R [M] \right) \quad (12)$$

Mass balance on A is given by

$$[A]_T = [HA]_{aq} + [A^-]_{aq} + [HA]_m + [A^-]_m \quad (13)$$

Substituting (7), (9), and (10) into (13) gives

$$[A]_T = [HA]_{aq} \left( 1 + \frac{K_a^{HA}}{[H^+]} + K_s^{HA} [M] + \frac{K_a}{[H^+]} K_s^{A^-} [M] \right) \quad (14)$$

Combining (12) and (14) gives the

$$[R]_T = \frac{K_{sp}}{[A]_T} \left( 1 + K_s^R [M] \right) \left( 1 + \frac{K_a^{HA}}{[H^+]} + K_s^{HA} [M] + \frac{K_a}{[H^+]} K_s^{A^-} [M] \right) \quad (15)$$

Where  $[R]_T$  and  $[A]_T$  are the total concentrations of drug and coformer when cocrystal and solution are in equilibrium. When  $K_s^{HA} \gg K_s^{A^-}$ , (15) can be simplified to

$$[R]_T = \frac{K_{sp}}{[A]_T} \left( 1 + K_s^R [M] \right) \left( 1 + \frac{K_a^{HA}}{[H^+]} + K_s^{HA} [M] \right) \quad (16)$$

#### *Eutectic solution concentrations of drug and coformer of cocrystal RHA*

At eutectic point  $E_1$ , solid drug, cocrystal, and solution coexist in equilibrium.

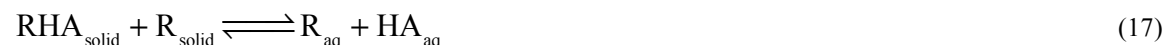

$[R]_{eu,T}$  and  $[A]_{eu,T}$ , the total concentrations of drug and coformer at the eutectic, are special solutions to Equation (16) when the following condition is satisfied

$$[R]_T = S_{R,T} \quad (18)$$

where  $S_{R,T}$  is the solubility of R in the eutectic solution. When drug and solubilization are mutually unaffected by coformer (and vice versa), then  $S_{R,T}$  is equivalent to the drug solubility in micellar solution (no coformer), which is given by

$$S_{R,T} = [R]_T = [R]_{aq} + [R]_m \quad (19)$$

$$S_{R,T} = S_{R,aq} (1 + K_s^R [M]) \quad (20)$$

where  $S_{R,aq}$  is the drug aqueous solubility. Thus,

$$[R]_{eu,T} = S_{R,aq} (1 + K_s^R [M]) \quad (21)$$

$$[A]_{eu,T} = \frac{K_{sp}}{S_{R,aq}} \left( 1 + \frac{K_a^{HA}}{[H^+]} + K_s^{HA} [M] \right) \quad (22)$$

The eutectic concentrations in water (no micellar solubilization) are found when  $[M] = 0$ ,

$$[R]_{eu,aq} = S_{R,aq} \quad (23)$$

$$[A]_{eu,aq} = \frac{K_{sp}}{S_{R,aq}} \left( 1 + \frac{K_a^{HA}}{[H^+]_{aq}} \right) \quad (24)$$

Combining Equations (21) to (24),  $[R]_{eu,T}$  and  $[A]_{eu,T}$  at  $[H^+] = [H^+]_T$  can be expressed in terms of  $[R]_{eu,aq}$  and  $[A]_{eu,aq}$  at  $[H^+] = [H^+]_{aq}$ .

$$[R]_{eu,T} = [R]_{eu,aq} (1 + K_s^R [M]) \quad (25)$$

$$[A]_{eu,T} = [A]_{eu,aq} \left( \frac{1 + \frac{K_a^{HA}}{[H^+]_T} + K_s^{HA} [M]}{1 + \frac{K_a^{HA}}{[H^+]_{aq}}} \right) \quad (26)$$

$E_2$ , the eutectic between solid coformer, cocrystal, and solution, is described by

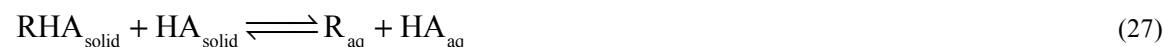

At  $E_2$ ,  $[R]_{eu,T}$  and  $[A]_{eu,T}$  are special solutions to Equation (16) when the following condition is satisfied

$$[A]_T = S_{A,T} \quad (28)$$

When drug and solubilization are mutually unaffected by coformer (and vice versa), then  $S_{A,T}$  is equivalent to the pure coformer solubility in micellar solution (no drug), which is given by the total coformer concentration in the aqueous and micellar environments

$$S_{A,T} = [A]_T = [HA]_{aq} + [A^-]_{aq} + [HA]_m \quad (29)$$

$$S_{A,T} = S_{HA,aq} \left( 1 + \frac{K_a^{HA}}{[H^+]} + K_s^{HA} [M] \right) \quad (30)$$

where  $S_{HA,aq}$  is the coformer intrinsic solubility. Solving for  $[R]_{eu,T}$  and  $[A]_{eu,T}$  according to Equation (16) for  $E_2$  yields the same expressions as (25) and (26).

#### *Eutectic constant $K_{eu}$ of cocrystal RHA*

The eutectic constant  $K_{eu}$  is given by

$$K_{eu} = \frac{a_{A,eu}}{a_{R,eu}} \quad (31)$$

Assuming dilute conditions where concentrations replace activities,

$$K_{eu} = \frac{[A]_{eu,T}}{[R]_{eu,T}} \quad (32)$$

Assuming there are no solution interactions aside from ionization and micellar solubilization, Equations (25) and (26) can be substituted into (32), which yields

$$K_{eu,T} = K_{eu,aq} \left( \frac{1}{1 + K_s^R [M]} \right) \left( \frac{1 + \frac{K_a^{HA}}{[H^+]_T} + K_s^{HA} [M]}{1 + \frac{K_a^{HA}}{[H^+]_{aq}}} \right) \quad (33)$$

where  $K_{eu,T}$  is the total  $K_{eu}$  in micellar solution at  $[H^+] = [H^+]_T$ , and  $K_{eu,aq}$  is the  $K_{eu}$  in pure water at  $[H^+] = [H^+]_{aq}$ .

#### *CSC of cocrystal RHA*

The CSC at  $[H^+]_T$  can be expressed as a function of  $K_{eu,aq}$  at  $[H^+]_{aq}$ . The CSC is determined by Equation (33) when  $K_{eu,T} = 1$  and solving for  $[M]$ ,

$$[M]_{\text{CSC}} = \frac{K_{\text{eu,aq}} \left( \frac{1 + \frac{K_a^{\text{HA}}}{[H^+]_{\text{T}}}}{1 + \frac{K_a^{\text{HA}}}{[H^+]_{\text{aq}}}} \right) - 1}{K_s^{\text{R}} - \frac{K_{\text{eu,aq}} K_s^{\text{HA}}}{\left( 1 + \frac{K_a^{\text{HA}}}{[H^+]_{\text{aq}}} \right)}} \quad (34)$$

$[M]_{\text{CSC}}$  is the micellar surfactant concentration associated with CSC. The CSC is

$$\text{CSC} = \frac{K_{\text{eu,aq}} \left( \frac{1 + \frac{K_a^{\text{HA}}}{[H^+]_{\text{T}}}}{1 + \frac{K_a^{\text{HA}}}{[H^+]_{\text{aq}}}} \right) - 1}{K_s^{\text{R}} - \frac{K_{\text{eu,aq}} K_s^{\text{HA}}}{\left( 1 + \frac{K_a^{\text{HA}}}{[H^+]_{\text{aq}}} \right)}} + \text{CMC} \quad (35)$$

*HXHA (1:1 monoprotic weakly acidic drug HX, monoprotic weakly acidic coformer HA)*

Relevant equilibria are given by

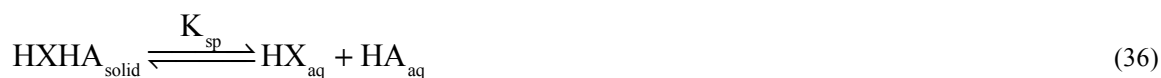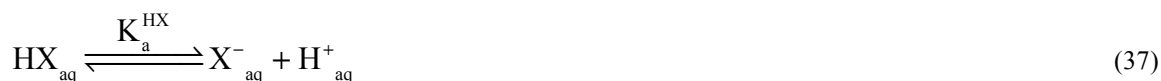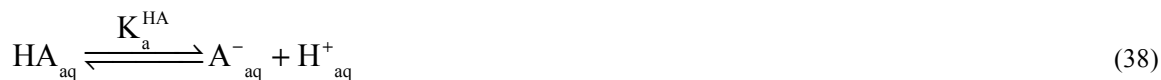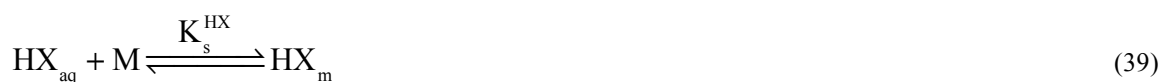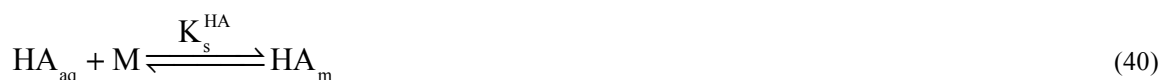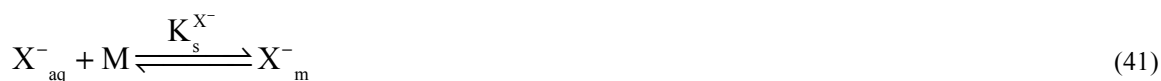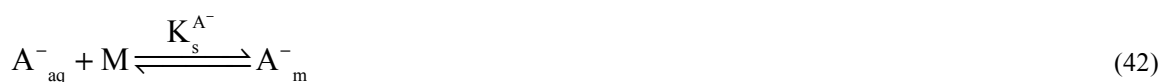

Associated equilibrium constants are given by

$$K_{\text{sp}} = [\text{HX}]_{\text{aq}} [\text{HA}]_{\text{aq}} \quad (43)$$

$$K_{\text{a}}^{\text{HX}} = \frac{[\text{X}^{-}]_{\text{aq}} [\text{H}^{+}]_{\text{aq}}}{[\text{HX}]_{\text{aq}}} \quad (44)$$

$$K_{\text{a}}^{\text{HA}} = \frac{[\text{A}^{-}]_{\text{aq}} [\text{H}^{+}]_{\text{aq}}}{[\text{HA}]_{\text{aq}}} \quad (45)$$

$$K_{\text{s}}^{\text{HX}} = \frac{[\text{HX}]_{\text{m}}}{[\text{HX}]_{\text{aq}} [\text{M}]} \quad (46)$$

$$K_{\text{s}}^{\text{HA}} = \frac{[\text{HA}]_{\text{m}}}{[\text{HA}]_{\text{aq}} [\text{M}]} \quad (47)$$

$$K_s^{X^-} = \frac{[X^-]_m}{[X^-]_{aq}[M]} \quad (48)$$

$$K_s^{A^-} = \frac{[A^-]_m}{[A^-]_{aq}[M]} \quad (49)$$

*Solubility of cocrystal HXHA*

Mass balance on X is given by

$$[X]_T = [HX]_{aq} + [X^-]_{aq} + [HX]_m + [X^-]_m \quad (50)$$

Substituting (43), (44), (46), and (48) into (50) gives

$$[X]_T = \frac{K_{sp}}{[HA]_{aq}} \left( 1 + \frac{K_a^{HX}}{[H^+]} + K_s^{HX}[M] + \frac{K_a^{HX}}{[H^+]} K_s^{X^-}[M] \right) \quad (51)$$

Mass balance on A is given by

$$[A]_T = [HA]_{aq} + [A^-]_{aq} + [HA]_m + [A^-]_m \quad (52)$$

Substituting (45), (47), and (49) into (52) gives

$$[A]_T = [HA]_{aq} \left( 1 + \frac{K_a^{HA}}{[H^+]} + K_s^{HA}[M] + \frac{K_a^{HA}}{[H^+]} K_s^{A^-}[M] \right) \quad (53)$$

Combining (51) and (53) gives

$$[X]_T = \frac{K_{sp}}{[A]_T} \left( 1 + \frac{K_a^{HX}}{[H^+]} + K_s^{HX}[M] + \frac{K_a^{HX}}{[H^+]} K_s^{X^-}[M] \right) \left( 1 + \frac{K_a^{HA}}{[H^+]} + K_s^{HA}[M] + \frac{K_a^{HA}}{[H^+]} K_s^{A^-}[M] \right) \quad (54)$$

where  $[X]_T$  and  $[A]_T$  are the total concentrations of drug and coformer when cocrystal and solution are in equilibrium. When  $K_s^{HX} \gg K_s^{X^-}$  and  $K_s^{HA} \gg K_s^{A^-}$ , then Equation (54) can be simplified to

$$[X]_T = \frac{K_{sp}}{[A]_T} \left( 1 + \frac{K_a^{HX}}{[H^+]} + K_s^{HX}[M] \right) \left( 1 + \frac{K_a^{HA}}{[H^+]} + K_s^{HA}[M] \right) \quad (55)$$

*Eutectic solution concentrations of drug and coformer of cocrystal HXHA*



At eutectic point  $E_1$ , solid drug, cocrystal, and solution coexist in equilibrium.

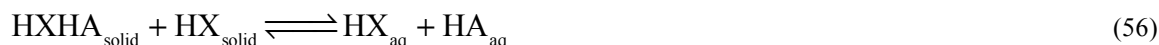

$[\text{X}]_{\text{eu,T}}$  and  $[\text{A}]_{\text{eu,T}}$ , the total concentrations of drug and coformer at the eutectic, are special solutions of Equation (55) when the following condition is satisfied

$$[\text{X}]_{\text{T}} = \text{S}_{\text{X,T}} \quad (57)$$

where  $\text{S}_{\text{X,T}}$  is the solubility of X at the eutectic. When drug and solubilization are mutually unaffected by coformer (and vice versa), then  $\text{S}_{\text{X,T}}$  is equivalent to the pure drug solubility in micellar solution (no coformer), which is given by the total drug concentration in the aqueous and micellar environments

$$\text{S}_{\text{X,T}} = [\text{X}]_{\text{T}} = [\text{HX}]_{\text{aq}} + [\text{X}^-]_{\text{aq}} + [\text{HX}]_{\text{m}} \quad (58)$$

$$\text{S}_{\text{X,T}} = \text{S}_{\text{HX,aq}} \left( 1 + \frac{\text{K}_{\text{a}}^{\text{HX}}}{[\text{H}^+]} + \text{K}_{\text{s}}^{\text{HX}}[\text{M}] \right) \quad (59)$$

where  $\text{S}_{\text{HX,aq}}$  is the drug intrinsic solubility. Thus,

$$[\text{X}]_{\text{eu,T}} = \text{S}_{\text{HX,aq}} \left( 1 + \frac{\text{K}_{\text{a}}^{\text{HX}}}{[\text{H}^+]} + \text{K}_{\text{s}}^{\text{HX}}[\text{M}] \right) \quad (60)$$

$$[\text{A}]_{\text{eu,T}} = \frac{\text{K}_{\text{sp}}}{\text{S}_{\text{HX,aq}}} \left( 1 + \frac{\text{K}_{\text{a}}^{\text{HA}}}{[\text{H}^+]} + \text{K}_{\text{s}}^{\text{HA}}[\text{M}] \right) \quad (61)$$

The eutectic concentrations in the absence of micellar solubilization are found when  $[\text{M}] = 0$ ,

$$[\text{X}]_{\text{eu,aq}} = \text{S}_{\text{HX,aq}} \left( 1 + \frac{\text{K}_{\text{a}}^{\text{HX}}}{[\text{H}^+]} \right) \quad (62)$$

$$[\text{A}]_{\text{eu,aq}} = \frac{\text{K}_{\text{sp}}}{\text{S}_{\text{HX,aq}}} \left( 1 + \frac{\text{K}_{\text{a}}^{\text{HA}}}{[\text{H}^+]} \right) \quad (63)$$

Combining Equations (60) to (63),  $[\text{X}]_{\text{eu,T}}$  and  $[\text{A}]_{\text{eu,T}}$  at  $[\text{H}^+] = [\text{H}^+]_{\text{T}}$  can be expressed in terms of  $[\text{X}]_{\text{eu,aq}}$  and  $[\text{A}]_{\text{eu,aq}}$  at  $[\text{H}^+] = [\text{H}^+]_{\text{aq}}$ .

$$[X]_{\text{eu},T} = [X]_{\text{eu},\text{aq}} \left( \frac{1 + \frac{K_a^{\text{HX}}}{[H^+]_T} + K_s^{\text{HX}}[M]}{1 + \frac{K_a^{\text{HX}}}{[H^+]_{\text{aq}}}} \right) \quad (64)$$

$$[A]_{\text{eu},T} = [A]_{\text{eu},\text{aq}} \left( \frac{1 + \frac{K_a^{\text{HA}}}{[H^+]_T} + K_s^{\text{HA}}[M]}{1 + \frac{K_a^{\text{HA}}}{[H^+]_{\text{aq}}}} \right) \quad (65)$$

$E_2$ , the eutectic between solid coformer, cocrystal, and solution, is described by

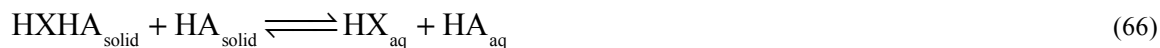

At  $E_2$ ,  $[X]_{\text{eu},T}$  and  $[A]_{\text{eu},T}$  are special solutions to Equation (55) when the following condition is satisfied

$$[A]_T = S_{A,T} \quad (67)$$

When drug and solubilization are mutually unaffected by coformer (and vice versa), then  $S_{A,T}$  is equivalent to the pure coformer solubility in micellar solution (no drug), which is given by the total coformer concentration in the aqueous and micellar environments

$$S_{A,T} = [A]_T = [\text{HA}]_{\text{aq}} + [\text{A}^-]_{\text{aq}} + [\text{HA}]_{\text{m}} \quad (68)$$

$$S_{A,T} = S_{\text{HA},\text{aq}} \left( 1 + \frac{K_a^{\text{HA}}}{[H^+]} + K_s^{\text{HA}}[M] \right) \quad (69)$$

where  $S_{\text{HA},\text{aq}}$  is the coformer intrinsic solubility. Solving for  $[X]_{\text{eu},T}$  and  $[A]_{\text{eu},T}$  according to Equation (55) for  $E_2$  yields the same expressions as (64) and (65).

#### *Eutectic constant $K_{\text{eu}}$ of cocrystal HXHA*

The eutectic constant  $K_{\text{eu}}$  is given by

$$K_{eu} = \frac{a_{A,eu}}{a_{X,eu}} \quad (70)$$

Assuming dilute conditions where concentrations replace activities,

$$K_{eu} = \frac{[A]_{eu,T}}{[X]_{eu,T}} \quad (71)$$

Assuming there are no solution interactions aside from ionization and micellar solubilization, Equations (64) and (65) can be substituted into (71), which yields

$$K_{eu,T} = K_{eu,aq} \left( \frac{1 + \frac{K_a^{HX}}{[H^+]_{aq}}}{1 + \frac{K_a^{HX}}{[H^+]_T} + K_s^{HX}[M]} \right) \left( \frac{1 + \frac{K_a^{HA}}{[H^+]_T} + K_s^{HA}[M]}{1 + \frac{K_a^{HA}}{[H^+]_{aq}}} \right) \quad (72)$$

where  $K_{eu,T}$  is the total  $K_{eu}$  in micellar solution at  $[H^+] = [H^+]_T$ , and  $K_{eu,aq}$  is the  $K_{eu}$  in pure water at  $[H^+] = [H^+]_{aq}$ .

#### *CSC of cocrystal HXHA*

The CSC at  $[H^+]_T$  can be expressed as a function of  $K_{eu,aq}$  at  $[H]_{aq}$ . The CSC is determined by Equation (72) when  $K_{eu,T} = 1$  and solving for  $[M]$ ,

$$[M]_{CSC} = \frac{K_{eu,aq} \left( \frac{1 + \frac{K_a^{HA}}{[H^+]_T}}{1 + \frac{K_a^{HA}}{[H^+]_{aq}}} \right) - \left( \frac{1 + \frac{K_a^{HX}}{[H^+]_T}}{1 + \frac{K_a^{HX}}{[H^+]_{aq}}} \right)}{\frac{K_s^{HX}}{\left( 1 + \frac{K_a^{HX}}{[H^+]} \right)} - \frac{K_{eu,aq} K_s^{HA}}{\left( 1 + \frac{K_a^{HA}}{[H^+]} \right)}} \quad (73)$$

$[M]_{CSC}$  is the micellar surfactant concentration associated with CSC. The CSC is

$$CSC = \frac{K_{eu,aq} \left( \frac{1 + \frac{K_a^{HA}}{[H^+]_T}}{1 + \frac{K_a^{HA}}{[H^+]_{aq}}} \right) - \left( \frac{1 + \frac{K_a^{HX}}{[H^+]_T}}{1 + \frac{K_a^{HX}}{[H^+]_{aq}}} \right)}{\frac{K_s^{HX}}{\left( 1 + \frac{K_a^{HX}}{[H^+]} \right)} - \frac{K_{eu,aq} K_s^{HA}}{\left( 1 + \frac{K_a^{HA}}{[H^+]} \right)}} + CMC \quad (74)$$

*BHA (1:1 monoprotic weakly basic drug B, monoprotic weakly acidic coformer HA)*

Relevant equilibria are given by

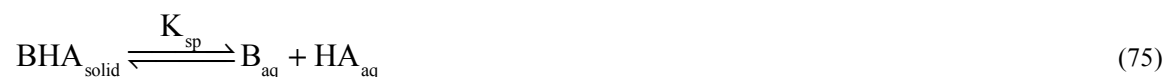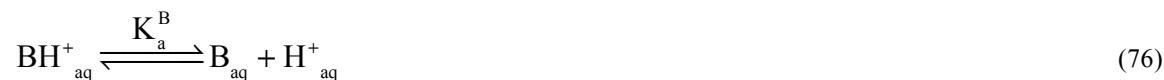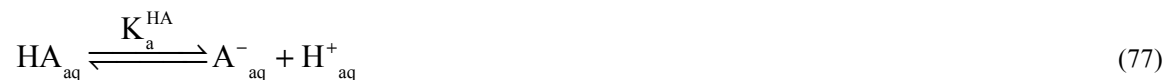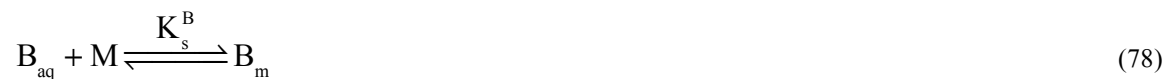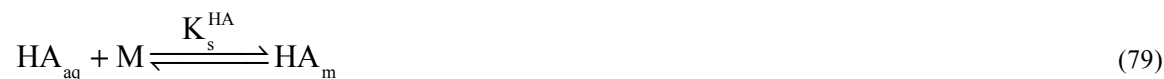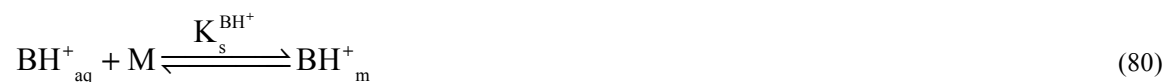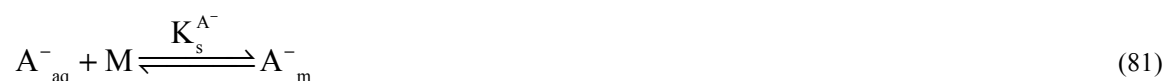

Associated equilibrium constants are given by

$$K_{sp} = [B]_{aq} [HA]_{aq} \quad (82)$$

$$K_a^B = \frac{[B]_{aq} [H^+]_{aq}}{[BH^+]_{aq}} \quad (83)$$

$$K_a^{HA} = \frac{[A^-]_{aq}[H^+]_{aq}}{[HA]_{aq}} \quad (84)$$

$$K_s^B = \frac{[B]_m}{[B]_{aq}[M]} \quad (85)$$

$$K_s^{HA} = \frac{[HA]_m}{[HA]_{aq}[M]} \quad (86)$$

$$K_s^{BH^+} = \frac{[BH^+]_m}{[B]_{aq}[M]} \quad (87)$$

$$K_s^{A^-} = \frac{[A^-]_m}{[A^-]_{aq}[M]} \quad (88)$$

*Solubility of cocrystal BHA*

Mass balance on B is given by

$$[B]_T = [B]_{aq} + [BH^+]_{aq} + [B]_m + [BH^+]_m \quad (89)$$

Substituting (82), (83), (85), and (87) into (89) gives

$$[B]_T = \frac{K_{sp}}{[HA]_{aq}} \left( 1 + \frac{[H^+]}{K_a^B} + K_s^B[M] + \frac{[H^+]}{K_a^B} K_s^B[M] \right) \quad (90)$$

Mass balance on A is given by

$$[A]_T = [HA]_{aq} + [A^-]_{aq} + [HA]_m + [A^-]_m \quad (91)$$

Substituting (84), (86), and (88) into (91) gives

$$[A]_T = [HA]_{aq} \left( 1 + \frac{K_a^{HA}}{[H^+]} + K_s^{HA}[M] + \frac{K_a^{HA}}{[H^+]} K_s^{A^-}[M] \right) \quad (92)$$

Combining (90) and (92) gives

$$[B]_T = \frac{K_{sp}}{[A]_T} \left( 1 + \frac{[H^+]}{K_a^B} + K_s^B[M] + \frac{[H^+]}{K_a^B} K_s^{BH^+}[M] \right) \left( 1 + \frac{K_a^{HA}}{[H^+]} + K_s^{HA}[M] + \frac{K_a^{HA}}{[H^+]} K_s^{A^-}[M] \right) \quad (93)$$

Where  $[B]_T$  and  $[A]_T$  are the total concentrations of drug and coformer when cocrystal and solution are in equilibrium. When  $K_s^B \gg K_s^{BH^+}$  and  $K_s^{HA} \gg K_s^{A^-}$ , then Equation (54) can be simplified to

$$[B]_T = \frac{K_{sp}}{[A]_T} \left( 1 + \frac{[H^+]}{K_a^B} + K_s^B[M] \right) \left( 1 + \frac{K_a^{HA}}{[H^+]} + K_s^{HA}[M] \right) \quad (94)$$

#### *Eutectic solution concentrations of drug and coformer of cocrystal BHA*

At eutectic point  $E_1$ , solid drug, cocrystal, and solution coexist in equilibrium.

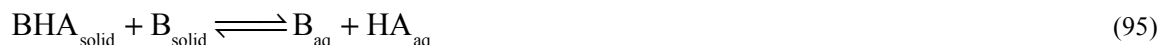

$[B]_{eu,T}$  and  $[A]_{eu,T}$ , the total concentrations of drug and coformer at the eutectic, are special solutions to Equation (94) when the following condition is satisfied

$$[B]_T = S_{B,T} \quad (96)$$

where  $S_{B,T}$  is the solubility of B in the eutectic solution. When drug and solubilization are mutually unaffected by coformer (and vice versa), then  $S_{B,T}$  is equivalent to the pure drug solubility in micellar solution (no coformer), which is given by the total drug concentration in the aqueous and micellar environments

$$S_{B,T} = [B]_T = [B]_{aq} + [BH^+]_{aq} + [B]_m \quad (97)$$

$$S_{B,T} = S_{B,aq} \left( 1 + \frac{[H^+]}{K_a^B} + K_s^B[M] \right) \quad (98)$$

where  $S_{B,aq}$  is the drug intrinsic solubility. Thus,

$$[B]_{eu,T} = S_{B,aq} \left( 1 + \frac{[H^+]}{K_a^B} + K_s^B[M] \right) \quad (99)$$

$$[A]_{eu,T} = \frac{K_{sp}}{S_{B,aq}} \left( 1 + \frac{K_a^{HA}}{[H^+]} + K_s^{HA}[M] \right) \quad (100)$$

The eutectic concentrations in the absence of micellar solubilization are found when  $[M] = 0$ ,

$$[B]_{eu,aq} = S_{B,aq} \left( 1 + \frac{[H^+]}{K_a^B} \right) \quad (101)$$

$$[A]_{\text{eu, aq}} = \frac{K_{\text{sp}}}{S_{\text{B, aq}}} \left( 1 + \frac{K_{\text{a}}^{\text{HA}}}{[H^+]} \right) \quad (102)$$

Combining Equations (99) to (102),  $[B]_{\text{eu, T}}$  and  $[A]_{\text{eu, T}}$  at  $[H^+] = [H^+]_{\text{T}}$  can be expressed in terms of  $[B]_{\text{eu, aq}}$  and  $[A]_{\text{eu, aq}}$  at  $[H^+] = [H^+]_{\text{aq}}$ .

$$[B]_{\text{eu, T}} = [B]_{\text{eu, aq}} \left( \frac{1 + \frac{[H^+]_{\text{T}}}{K_{\text{a}}^{\text{B}}} + K_{\text{s}}^{\text{B}}[M]}{1 + \frac{[H^+]_{\text{aq}}}{K_{\text{a}}^{\text{B}}}} \right) \quad (103)$$

$$[A]_{\text{eu, T}} = [A]_{\text{eu, aq}} \left( \frac{1 + \frac{K_{\text{a}}^{\text{HA}}}{[H^+]_{\text{T}}} + K_{\text{s}}^{\text{HA}}[M]}{1 + \frac{K_{\text{a}}^{\text{HA}}}{[H^+]_{\text{aq}}}} \right) \quad (104)$$

$E_2$ , the eutectic between solid coformer, cocrystal, and solution, is described by

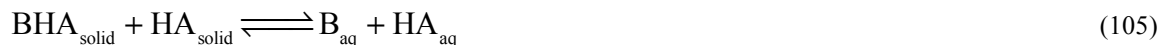

$[B]_{\text{eu, T}}$  and  $[A]_{\text{eu, T}}$  are special solutions to Equation (104) when the following condition is satisfied

$$[A]_{\text{T}} = S_{\text{A, T}} \quad (106)$$

When drug and solubilization are mutually unaffected by coformer (and vice versa), then  $S_{\text{A, T}}$  is equivalent to the pure coformer solubility in micellar solution (no drug), which is given by the total coformer concentration in the aqueous and micellar environments

$$S_{\text{A, T}} = [A]_{\text{T}} = [\text{HA}]_{\text{aq}} + [\text{A}^-]_{\text{aq}} + [\text{HA}]_{\text{m}} \quad (107)$$

$$S_{\text{A, T}} = S_{\text{HA, aq}} \left( 1 + \frac{K_{\text{a}}^{\text{HA}}}{[H^+]} + K_{\text{s}}^{\text{HA}}[M] \right) \quad (108)$$

where  $S_{\text{HA, aq}}$  is the coformer intrinsic solubility. Solving for  $[B]_{\text{eu, T}}$  and  $[A]_{\text{eu, T}}$  according to Equation (55) for  $E_2$  yields the same expressions as (103) and (104).

### Eutectic constant $K_{eu}$ of cocrystal BHA

The eutectic constant  $K_{eu}$  is given by

$$K_{eu} = \frac{a_{A,eu}}{a_{B,eu}} \quad (109)$$

Assuming dilute conditions where concentrations replace activities,

$$K_{eu} = \frac{[A]_{eu,T}}{[B]_{eu,T}} \quad (110)$$

Assuming there are no solution interactions aside from ionization and micellar solubilization, Equations (103) and (104) can be substituted into (110), which yields

$$K_{eu,T} = K_{eu,aq} \left( \frac{1 + \frac{[H^+]_{aq}}{K_a^B}}{1 + \frac{[H^+]_T}{K_a^B} + K_s^B[M]} \right) \left( \frac{1 + \frac{K_a^{HA}}{[H^+]_T} + K_s^{HA}[M]}{1 + \frac{K_a^{HA}}{[H^+]_{aq}}} \right) \quad (111)$$

where  $K_{eu,T}$  is the total  $K_{eu}$  in micellar solution at  $[H^+] = [H^+]_T$ , and  $K_{eu,aq}$  is the  $K_{eu}$  in pure water at  $[H^+] = [H^+]_{aq}$ .

### CSC of cocrystal BHA

The CSC at  $[H^+]_T$  can be expressed as a function of  $K_{eu,aq}$  at  $[H^+]_{aq}$ . The CSC at a given pH is determined by Equation (111) when  $K_{eu,T} = 1$  and solving for  $[M]$ ,

$$[M]_{CSC} = \frac{K_{eu,aq} \left( \frac{1 + \frac{K_a^{HA}}{[H^+]_T}}{1 + \frac{K_a^{HA}}{[H^+]_{aq}}} \right) - \left( \frac{1 + \frac{[H^+]_T}{K_a^B}}{1 + \frac{[H^+]_{aq}}{K_a^B}} \right)}{\frac{K_s^B}{\left( 1 + \frac{[H^+]_{aq}}{K_a^B} \right)} - \frac{K_{eu,aq} K_s^{HA}}{\left( 1 + \frac{K_a^{HA}}{[H^+]_{aq}} \right)}} \quad (112)$$

$[M]_{CSC}$  is the micellar surfactant concentration associated with CSC. The CSC is



$$CSC = \frac{K_{eu,aq} \left( \frac{1 + \frac{K_a^{HA}}{[H^+]_T}}{1 + \frac{K_a^{HA}}{[H^+]_{aq}}} \right) - \left( \frac{1 + \frac{[H^+]_T}{K_a^B}}{1 + \frac{[H^+]_{aq}}{K_a^B}} \right)}{\frac{K_s^B}{\left( 1 + \frac{[H^+]_{aq}}{K_a^B} \right)} - \frac{K_{eu,aq} K_s^{HA}}{\left( 1 + \frac{K_a^{HA}}{[H^+]_{aq}} \right)}} + CMC \quad (113)$$

$R_2H_2A$  (2:1 monoprotic weakly basic drug R, diprotic weakly acidic coformer  $H_2A$ )

Relevant equilibria are given by

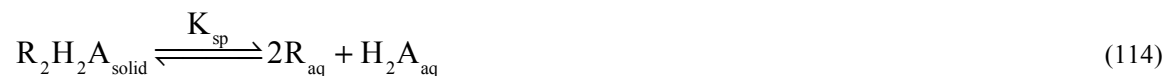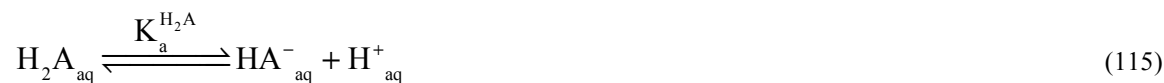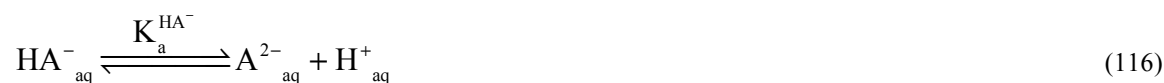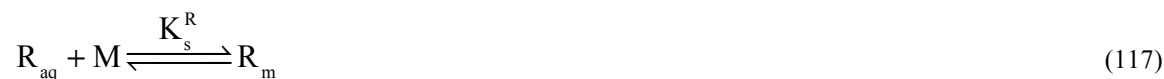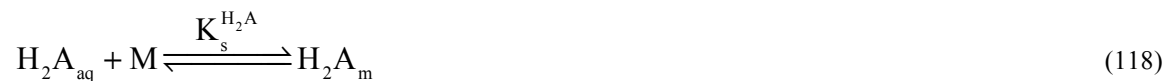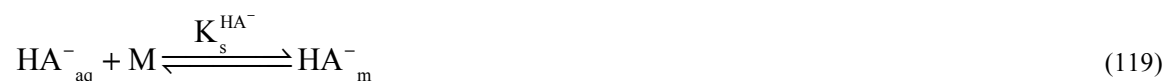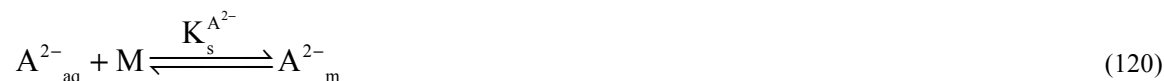

Associated equilibrium constants are given by

$$K_{sp} = [R]_{aq}^2 [H_2A]_{aq} \quad (121)$$

$$K_a^{H_2A} = \frac{[HA^-]_{aq} [H^+]_{aq}}{[H_2A]_{aq}} \quad (122)$$

$$K_a^{HA^-} = \frac{[A^{2-}]_{aq}[H^+]_{aq}}{[HA^-]_{aq}} \quad (123)$$

$$K_s^R = \frac{[R]_m}{[R]_{aq}[M]} \quad (124)$$

$$K_s^{H_2A} = \frac{[H_2A]_m}{[H_2A]_{aq}[M]} \quad (125)$$

$$K_s^{HA^-} = \frac{[HA^-]_m}{[HA^-]_{aq}[M]} \quad (126)$$

$$K_s^{A^{2-}} = \frac{[A^{2-}]_m}{[A^{2-}]_{aq}[M]} \quad (127)$$

*Solubility of cocrystal  $R_2H_2A$*

Mass balance on R is given by

$$[R]_T = [R]_{aq} + [R]_m \quad (128)$$

Substituting (121) and (124) into (128) gives

$$[R]_T^2 = \frac{K_{sp}}{[H_2A]_{aq}} \left( 1 + K_s^R[M] \right)^2 \quad (129)$$

Mass balance on A is given by

$$[A]_T = [H_2A]_{aq} + [HA^-]_{aq} + [A^{2-}]_{aq} + [H_2A]_m + [HA^-]_m + [A^{2-}]_m \quad (130)$$

Substituting (122), (123), and (125)-(127) into (130) gives

$$[A]_T = [H_2A]_{aq} \left( 1 + \frac{K_a^{H_2A}}{[H^+]} + \frac{K_a^{H_2A}K_a^{HA^-}}{[H^+]^2} + K_s^{H_2A}[M] + \frac{K_a^{H_2A}}{[H^+]}K_s^{HA^-}[M] + \frac{K_a^{H_2A}K_a^{HA^-}}{[H^+]^2}K_s^{A^{2-}}[M] \right) \quad (131)$$

Combining (129) and (131) gives

$$[R]_T^2 = \frac{K_{sp}}{[A]_T} \left( 1 + K_s^R[M] \right)^2 \left( 1 + \frac{K_a^{H_2A}}{[H^+]} + \frac{K_a^{H_2A}K_a^{HA^-}}{[H^+]^2} + K_s^{H_2A}[M] + \frac{K_a^{H_2A}}{[H^+]}K_s^{HA^-}[M] + \frac{K_a^{H_2A}K_a^{HA^-}}{[H^+]^2}K_s^{A^{2-}}[M] \right) \quad (132)$$

where  $[R]_T$  and  $[A]_T$  are the total concentrations of drug and coformer when cocrystal and solution are in equilibrium. When  $K_s^{H_2A} \gg K_s^{HA^-}$  and  $K_s^{H_2A} \gg K_s^{A^{2-}}$ , (132) can be simplified to

$$[R]_T^2 = \frac{K_{sp}}{[A]_T} \left(1 + K_s^R [M]\right)^2 \left(1 + \frac{K_a^{H_2A}}{[H^+]} + \frac{K_a^{H_2A} K_a^{HA^-}}{[H^+]^2} + K_s^{H_2A} [M]\right) \quad (133)$$

#### *Eutectic solution concentrations of drug and coformer of cocrystal $R_2H_2A$*

At eutectic point  $E_1$ , solid drug, cocrystal, and solution coexist in equilibrium.

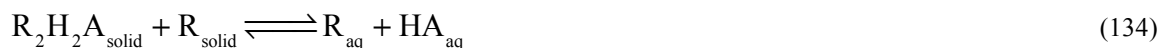

$[R]_{eu,T}$  and  $[A]_{eu,T}$ , the total concentrations of drug and coformer at the eutectic, are special solutions to Equation (133) when the following condition is satisfied

$$[R]_T = S_{R,T} \quad (135)$$

where  $S_{R,T}$  is the solubility of R in the eutectic solution. When drug and solubilization are mutually unaffected by coformer (and vice versa), then  $S_{R,T}$  is equivalent to the pure drug solubility in micellar solution (no coformer), which is given by the total drug concentration in the aqueous and micellar environments

$$S_{R,T} = [R]_T = [R]_{aq} + [R]_m \quad (136)$$

$$S_{R,T} = S_{R,aq} \left(1 + K_s^R [M]\right) \quad (137)$$

where  $S_{R,aq}$  is the drug aqueous solubility. Thus,

$$[R]_{eu,T} = S_{R,aq} \left(1 + K_s^R [M]\right) \quad (138)$$

$$[A]_{eu,T} = \frac{K_{sp}}{S_{R,aq}^2} \left(1 + \frac{K_a^{H_2A}}{[H^+]} + \frac{K_a^{H_2A} K_a^{HA^-}}{[H^+]^2} + K_s^{H_2A} [M]\right) \quad (139)$$

The eutectic concentrations in the absence of micellar solubilization are found when  $[M] = 0$ ,

$$[R]_{eu,aq} = S_{R,aq} \quad (140)$$

$$[A]_{\text{eu, aq}} = \frac{K_{\text{sp}}}{S_{\text{R, aq}}^2} \left( 1 + \frac{K_a^{\text{H}_2\text{A}}}{[\text{H}^+]} + \frac{K_a^{\text{H}_2\text{A}} K_a^{\text{HA}^-}}{[\text{H}^+]^2} \right) \quad (141)$$

Combining Equations (138) to (141),  $[R]_{\text{eu, T}}$  and  $[A]_{\text{eu, T}}$  at  $[\text{H}^+] = [\text{H}^+]_{\text{T}}$  can be expressed in terms of  $[R]_{\text{eu, aq}}$  and  $[A]_{\text{eu, aq}}$  at  $[\text{H}^+] = [\text{H}^+]_{\text{aq}}$ .

$$[R]_{\text{eu, T}} = [R]_{\text{eu, aq}} (1 + K_s^{\text{R}} [\text{M}]) \quad (142)$$

$$[A]_{\text{eu, T}} = [A]_{\text{eu, aq}} \left( \frac{1 + \frac{K_a^{\text{H}_2\text{A}}}{[\text{H}^+]_{\text{T}}} + \frac{K_a^{\text{H}_2\text{A}} K_a^{\text{HA}^-}}{[\text{H}^+]_{\text{T}}^2} + K_s^{\text{H}_2\text{A}} [\text{M}]}{1 + \frac{K_a^{\text{H}_2\text{A}}}{[\text{H}^+]_{\text{aq}}} + \frac{K_a^{\text{H}_2\text{A}} K_a^{\text{HA}^-}}{[\text{H}^+]_{\text{aq}}^2}} \right) \quad (143)$$

$E_2$ , the eutectic between solid coformer, cocrystal, and solution, is described by

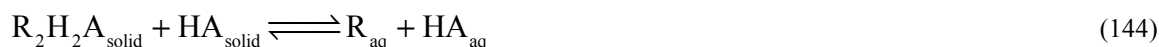

At  $E_2$ ,  $[R]_{\text{eu, T}}$  and  $[A]_{\text{eu, T}}$  are special solutions to Equation (133) when the following condition is satisfied

$$[A]_{\text{T}} = S_{\text{A, T}} \quad (145)$$

When drug and solubilization are mutually unaffected by coformer (and vice versa), then  $S_{\text{A, T}}$  is equivalent to the pure coformer solubility in micellar solution (no drug), which is given by the total coformer concentration in the aqueous and micellar environments

$$S_{\text{A, T}} = [A]_{\text{T}} = [\text{H}_2\text{A}]_{\text{aq}} + [\text{HA}^-]_{\text{aq}} + [\text{A}^{2-}]_{\text{aq}} + [\text{H}_2\text{A}]_{\text{m}} \quad (146)$$

$$S_{\text{A, T}} = S_{\text{HA, aq}} \left( 1 + \frac{K_a^{\text{H}_2\text{A}}}{[\text{H}^+]} + \frac{K_a^{\text{H}_2\text{A}} K_a^{\text{HA}^-}}{[\text{H}^+]^2} + K_s^{\text{H}_2\text{A}} [\text{M}] \right) \quad (147)$$

where  $S_{\text{H}_2\text{A, aq}}$  is the coformer intrinsic solubility. Solving for  $[R]_{\text{eu, T}}$  and  $[A]_{\text{eu, T}}$  according to Equation (133) for  $E_2$  yields the same expressions as (142) and (143).

#### Eutectic constant $K_{\text{eu}}$ of cocrystal $\text{R}_2\text{H}_2\text{A}$

The eutectic constant  $K_{\text{eu}}$  is given by

$$K_{eu} = \frac{a_{A,eu}}{a_{R,eu}} \quad (148)$$

Assuming dilute conditions where concentrations replace activities,

$$K_{eu} = \frac{[A]_{eu,T}}{[R]_{eu,T}} \quad (149)$$

Assuming there are no solution interactions aside from ionization and micellar solubilization, Equations (142) and (143) can be substituted into (149), which yields

$$K_{eu,T} = K_{eu,aq} \left( \frac{1}{1 + K_s^R [M]} \right) \left( \frac{1 + \frac{K_a^{H_2A}}{[H^+]_T} + \frac{K_a^{H_2A} K_a^{HA^-}}{[H^+]_T^2} + K_s^{H_2A} [M]}{1 + \frac{K_a^{H_2A}}{[H^+]_{aq}} + \frac{K_a^{H_2A} K_a^{HA^-}}{[H^+]_{aq}^2}} \right) \quad (150)$$

where  $K_{eu,T}$  is the total  $K_{eu}$  in micellar solution at  $[H^+] = [H^+]_T$ , and  $K_{eu,aq}$  is the  $K_{eu}$  in pure water at  $[H^+] = [H^+]_{aq}$ .

#### CSC of cocrystal $R_2H_2A$

The CSC at  $[H^+]_T$  can be expressed as a function of  $K_{eu,aq}$  at  $[H^+]_{aq}$ . The CSC at a given pH is determined by Equation (33) when  $K_{eu,T} = 0.5$  and solving for  $[M]$ ,

$$[M]_{CSC} = \frac{2K_{eu,aq} \left( \frac{1 + \frac{K_a^{H_2A}}{[H^+]_T} + \frac{K_a^{H_2A} K_a^{HA^-}}{[H^+]_T^2}}{1 + \frac{K_a^{H_2A}}{[H^+]_{aq}} + \frac{K_a^{H_2A} K_a^{HA^-}}{[H^+]_{aq}^2}} \right) - 1}{K_s^R - \frac{2K_{eu,aq} K_s^{H_2A}}{\left( 1 + \frac{K_a^{H_2A}}{[H^+]_{aq}} + \frac{K_a^{H_2A} K_a^{HA^-}}{[H^+]_{aq}^2} \right)}} \quad (151)$$

$[M]_{CSC}$  is the micellar surfactant concentration associated with CSC. The CSC is

$$CSC = \frac{2K_{eu,aq} \left( \frac{1 + \frac{K_a^{H_2A}}{[H^+]_T} + \frac{K_a^{H_2A} K_a^{HA^-}}{[H^+]_T^2}}{1 + \frac{K_a^{H_2A}}{[H^+]_{aq}} + \frac{K_a^{H_2A} K_a^{HA^-}}{[H^+]_{aq}^2}} \right) - 1}{K_s^R - \frac{2K_{eu,aq} K_s^{H_2A}}{\left( 1 + \frac{K_a^{H_2A}}{[H^+]_{aq}} + \frac{K_a^{H_2A} K_a^{HA^-}}{[H^+]_{aq}^2} \right)}} + CMC \quad (152)$$

*R<sub>2</sub>HAB (2:1 monoprotic weakly basic drug R, amphoteric coformer HAB)*

Relevant equilibria are given by

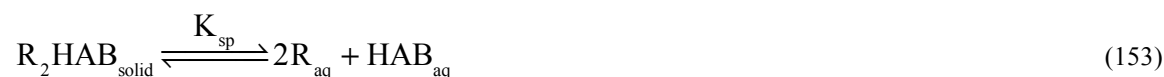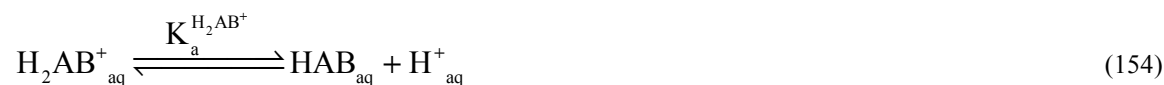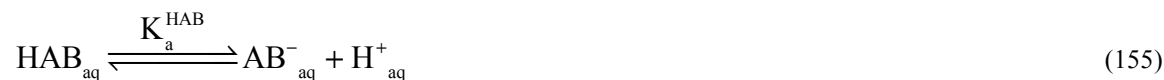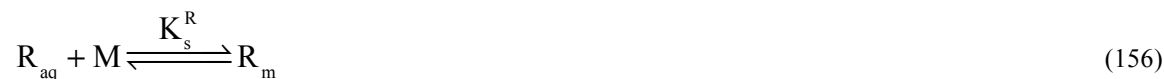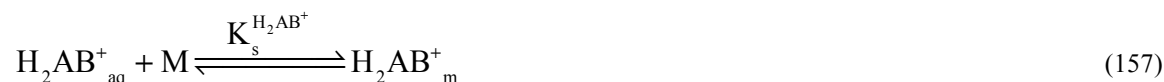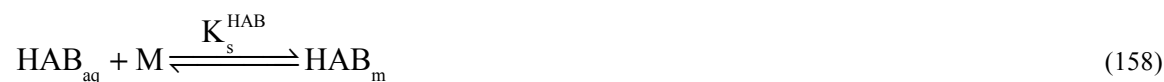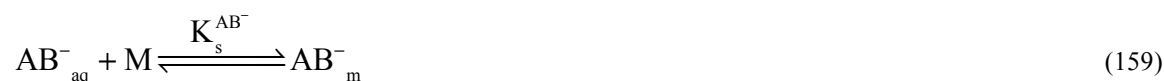

Associated equilibrium constants are given by

$$K_{sp} = [R]_{aq}^2 [HAB]_{aq} \quad (160)$$

$$K_a^{H_2AB^+} = \frac{[HAB]_{aq} [H^+]_{aq}}{[H_2AB^+]_{aq}} \quad (161)$$

$$K_a^{HAB} = \frac{[AB^-]_{aq}[H^+]_{aq}}{[HAB]_{aq}} \quad (162)$$

$$K_s^R = \frac{[R]_m}{[R]_{aq}[M]} \quad (163)$$

$$K_s^{H_2AB^+} = \frac{[H_2AB^+]_m}{[H_2AB^+]_{aq}[M]} \quad (164)$$

$$K_s^{HAB} = \frac{[HAB]_m}{[HAB]_{aq}[M]} \quad (165)$$

$$K_s^{AB^-} = \frac{[AB^-]_m}{[AB^-]_{aq}[M]} \quad (166)$$

*Solubility of cocrystal R<sub>2</sub>HAB*

Mass balance on B is given by

$$[R]_T = [R]_{aq} + [R]_m \quad (167)$$

Substituting (160) and (163) into (167) gives

$$[R]_T^2 = \frac{K_{sp}}{[HAB]_{aq}} (1 + K_s^R[M])^2 \quad (168)$$

Mass balance on AB is given by

$$[AB]_T = [HAB]_{aq} + [H_2AB^+]_{aq} + [AB^-]_{aq} + [HAB]_m + [H_2AB^+]_m + [AB^-]_m \quad (169)$$

Substituting (161), (162), and (164)-(166) into (169) gives

$$[AB]_T = [HAB]_{aq} \left( 1 + \frac{[H^+]}{K_a^{H_2AB^+}} + \frac{K_a^{HAB}}{[H^+]} + K_s^{HAB}[M] + \frac{[H^+]}{K_a^{H_2AB^+}} K_s^{H_2AB^+}[M] + \frac{K_a^{HAB}}{[H^+]} K_s^{AB^-}[M] \right) \quad (170)$$

Combining (168) and (170) gives

$$[R]_T^2 = \frac{K_{sp}}{[AB]_T} (1 + K_s^R[M])^2 \left( 1 + \frac{[H^+]}{K_a^{H_2AB^+}} + \frac{K_a^{HAB}}{[H^+]} + K_s^{HAB}[M] + \frac{[H^+]}{K_a^{H_2AB^+}} K_s^{H_2AB^+}[M] + \frac{K_a^{HAB}}{[H^+]} K_s^{AB^-}[M] \right) \quad (171)$$

where  $[R]_T$  and  $[AB]_T$  are the total concentrations of drug and coformer when cocrystal and solution are in equilibrium. When  $K_s^{HAB} \gg K_s^{H_2AB^+}$  and  $K_s^{HAB} \gg K_s^{AB^-}$ , (171) can be simplified to

$$[R]_T^2 = \frac{K_{sp}}{[AB]_T} (1 + K_s^R [M])^2 \left( 1 + \frac{[H^+]}{K_a^{H_2AB^+}} + \frac{K_a^{HAB}}{[H^+]} + K_s^{HAB} [M] \right) \quad (172)$$

#### *Eutectic solution concentrations of drug and coformer of cocrystal $R_2HAB$*

At eutectic point  $E_1$ , solid drug, cocrystal, and solution coexist in equilibrium.

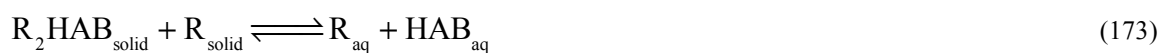

$[R]_{eu,T}$  and  $[AB]_{eu,T}$ , the total concentrations of drug and coformer at the eutectic, are special solutions to Equation (172) when the following condition is satisfied

$$[R]_T = S_{R,T} \quad (174)$$

where  $S_{R,T}$  is the solubility of R in the eutectic solution. When drug and solubilization are mutually unaffected by coformer (and vice versa), then  $S_{R,T}$  is equivalent to the pure drug solubility in micellar solution (no coformer), which is given by the total drug concentration in the aqueous and micellar environments

$$S_{R,T} = [R]_T = [R]_{aq} + [R]_m \quad (175)$$

$$S_{R,T} = S_{R,aq} (1 + K_s^R [M]) \quad (176)$$

where  $S_{R,aq}$  is the drug aqueous solubility. Thus,

$$[R]_{eu,T} = S_{R,aq} (1 + K_s^R [M]) \quad (177)$$

$$[AB]_{eu,T} = \frac{K_{sp}}{S_{R,aq}^2} \left( 1 + \frac{[H^+]}{K_a^{H_2AB^+}} + \frac{K_a^{HAB}}{[H^+]} + K_s^{HAB} [M] \right) \quad (178)$$

The eutectic concentrations in the absence of micellar solubilization are found when  $[M] = 0$ ,

$$[R]_{eu,aq} = S_{R,aq} \quad (179)$$



$$[AB]_{eu,aq} = \frac{K_{sp}}{S_{R,aq}^2} \left( 1 + \frac{[H^+]}{K_a^{H_2AB^+}} + \frac{K_a^{HAB}}{[H^+]} \right) \quad (180)$$

Combining Equations (177) to (180),  $[R]_{eu,T}$  and  $[AB]_{eu,T}$  at  $[H^+] = [H^+]_T$  can be expressed in terms of  $[R]_{eu,aq}$  and  $[AB]_{eu,aq}$  at  $[H^+] = [H^+]_{aq}$

$$[R]_{eu,T} = [R]_{eu,aq} \left( 1 + K_s^R [M] \right) \quad (181)$$

$$[AB]_{eu,T} = [AB]_{eu,aq} \left( \frac{1 + \frac{[H^+]_T}{K_a^{H_2AB^+}} + \frac{K_a^{HAB}}{[H^+]_T} + K_s^{HAB} [M]}{1 + \frac{[H^+]_{aq}}{K_a^{H_2AB^+}} + \frac{K_a^{HAB}}{[H^+]_{aq}}} \right) \quad (182)$$

$E_2$ , the eutectic between solid coformer, cocrystal, and solution, is described by

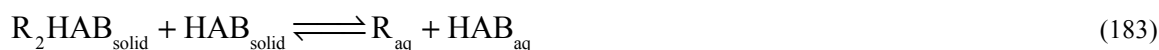

$[R]_{eu,T}$  and  $[AB]_{eu,T}$  are special solutions to Equation (172) when the following condition is satisfied

$$[AB]_T = S_{AB,T} \quad (184)$$

When drug and solubilization are mutually unaffected by coformer (and vice versa), then  $S_{AB,T}$  is equivalent to the pure coformer solubility in micellar solution (no drug), which is given by the total coformer concentration in the aqueous and micellar environments

$$S_{AB,T} = [AB]_T = [HAB]_{aq} + [H_2AB^+]_{aq} + [AB^-]_{aq} + [HAB]_m \quad (185)$$

$$S_{AB,T} = S_{HAB,aq} \left( 1 + \frac{[H^+]}{K_a^{H_2AB^+}} + \frac{K_a^{HAB}}{[H^+]} + K_s^{HAB} [M] \right) \quad (186)$$

where  $S_{HAB,aq}$  is the coformer intrinsic solubility. Solving for  $[R]_{eu,T}$  and  $[AB]_{eu,T}$  according to Equation (16) for  $E_2$  yields the same expressions as (25) and (26).

*Eutectic constant  $K_{eu}$  of cocrystal  $R_2HAB$*

The eutectic constant  $K_{eu}$  is given by

$$K_{eu} = \frac{a_{AB,eu}}{a_{R,eu}} \quad (187)$$

Assuming dilute conditions where concentrations replace activities,

$$K_{eu} = \frac{[AB]_{eu,T}}{[R]_{eu,T}} \quad (188)$$

Assuming there are no solution interactions aside from ionization and micellar solubilization, Equations (181) and (182) can be substituted into (149), which yields

$$K_{eu,T} = K_{eu,aq} \left( \frac{1}{1 + K_s^R [M]} \right) \left( \frac{1 + \frac{[H^+]_T}{K_a^{H_2AB^+}} + \frac{K_a^{HAB}}{[H^+]_T} + K_s^{HAB} [M]}{1 + \frac{[H^+]_{aq}}{K_a^{H_2AB^+}} + \frac{K_a^{HAB}}{[H^+]_{aq}}} \right) \quad (189)$$

where  $K_{eu,T}$  is the total  $K_{eu}$  in micellar solution at  $[H^+] = [H^+]_T$ , and  $K_{eu,aq}$  is the  $K_{eu}$  in pure water at  $[H^+] = [H^+]_{aq}$ .

#### *CSC of cocrystal $R_2HAB$*

The CSC at  $[H^+]_T$  can be expressed as a function of  $K_{eu,aq}$  at  $[H^+]_{aq}$ . The CSC at a given pH is determined by Equation (33) when  $K_{eu,T} = 0.5$  and solving for  $[M]$ ,

$$[M]_{CSC} = \frac{2K_{eu,aq} \left( \frac{1 + \frac{[H^+]_T}{K_a^{H_2AB^+}} + \frac{K_a^{HAB}}{[H^+]_T}}{1 + \frac{[H^+]_{aq}}{K_a^{H_2AB^+}} + \frac{K_a^{HAB}}{[H^+]_{aq}}} \right) - 1}{K_s^R - \frac{2K_{eu,aq} K_s^{HAB}}{\left( 1 + \frac{[H^+]_{aq}}{K_a^{H_2AB^+}} + \frac{K_a^{HAB}}{[H^+]_{aq}} \right)}} \quad (190)$$

$[M]_{CSC}$  is the micellar surfactant concentration associated with CSC. The CSC is

$$\text{CSC} = \frac{2K_{\text{eu, aq}} \left( \frac{1 + \frac{[\text{H}^+]_{\text{T}}}{K_{\text{a}}^{\text{H}_2\text{AB}^+}} + \frac{K_{\text{a}}^{\text{HAB}}}{[\text{H}^+]_{\text{T}}}}{1 + \frac{[\text{H}^+]_{\text{aq}}}{K_{\text{a}}^{\text{H}_2\text{AB}^+}} + \frac{K_{\text{a}}^{\text{HAB}}}{[\text{H}^+]_{\text{aq}}}} - 1 \right)}{K_{\text{s}}^{\text{R}} - \frac{2K_{\text{eu, aq}} K_{\text{s}}^{\text{HAB}}}{\left( 1 + \frac{[\text{H}^+]_{\text{aq}}}{K_{\text{a}}^{\text{H}_2\text{AB}^+}} + \frac{K_{\text{a}}^{\text{HAB}}}{[\text{H}^+]_{\text{aq}}} \right)}} + \text{CMC} \tag{191}$$

**Table 1.** CBZD and coformer solubilities ( $\pm$ SE) measured as a function of SLS concentration, from which  $K_s$  values were calculated.

| Cocrystal component | [SLS] (mM) | Concentration (mM) |
|---------------------|------------|--------------------|
| CBZ                 | 8          | 1.00 $\pm$ 0.01    |
|                     | 10         | 1.86 $\pm$ 0.05    |
|                     | 15         | 3.58 $\pm$ 0.12    |
|                     | 17         | 3.97 $\pm$ 0.05    |
|                     | 20         | 5.10 $\pm$ 0.03    |
|                     | 35         | 9.30 $\pm$ 0.29    |
|                     | 51         | 13.43 $\pm$ 0.41   |
|                     | 67         | 17.35 $\pm$ 0.19   |
|                     | 100        | 24.81 $\pm$ 1.13   |
|                     | 140        | 33.53 $\pm$ 0.85   |
| SLC, pH 3.0         | 35         | 34.01 $\pm$ 0.46   |
|                     | 52         | 43.44 $\pm$ 0.97   |
|                     | 69         | 50.32 $\pm$ 0.63   |
| SAC, pH 2.2         | 35         | 26.15 $\pm$ 0.10   |
|                     | 52         | 28.89 $\pm$ 0.07   |
|                     | 69         | 30.46 $\pm$ 0.46   |

\* 4ABA and SUC did not exhibit significant solubilization by SLS ( $K_s < 0.010$ ).
